# Supplementary material for: Charge-transfer excited states in phosphorescent organo-transition metal compounds: a difficult case for time dependent density functional theory?
Source: Royal Society of Chemistry journal article supplement (doi:10.1039/c5ra12962a), 2015-01-01
Supplement: c5ra12962a1.pdf [file c5ra12962a1.pdf]

# Charge-Transfer Excited States in Phosphorescent Organo-Transition Metal Compounds: A Difficult Case for Time Dependent Density Functional Theory?

Thomas A. Niehaus<sup>\*a</sup>, Thomas Hofbeck<sup>b</sup> and Hartmut Yersin<sup>\*b</sup>

<sup>a</sup>Institut für Theoretische Physik

<sup>b</sup>Institut für Physikalische Chemie

Universität Regensburg, 93040 Regensburg, Germany

---

\*Corresponding authors: [thomas.niehaus@ur.de](mailto:thomas.niehaus@ur.de) and [hartmut.yersin@ur.de](mailto:hartmut.yersin@ur.de)

## 1. VERTICAL ABSORPTION ENERGIES AND 0-0 CORRECTION

| #         | ZPE <sub>T<sub>1</sub></sub> | ZPE <sub>S<sub>0</sub></sub> | $\Delta E_{\text{relax}}$ |
|-----------|------------------------------|------------------------------|---------------------------|
| <b>1</b>  | 7.04                         | 7.13                         | 0.26                      |
| <b>2</b>  | 16.86                        | 16.95                        | 0.13                      |
| <b>3</b>  | 8.67                         | 8.76                         | 0.31                      |
| <b>4</b>  | 6.82                         | 6.91                         | 0.03                      |
| <b>5</b>  | 6.47                         | 6.57                         | 0.28                      |
| <b>6</b>  | 12.50                        | 12.58                        | 0.32                      |
| <b>7</b>  | 6.38                         | 6.49                         | 0.18                      |
| <b>8</b>  | 12.64                        | 12.74                        | 0.27                      |
| <b>9</b>  | 9.65                         | 9.74                         | 0.32                      |
| <b>10</b> | 8.65                         | 8.75                         | 0.29                      |
| <b>11</b> | 12.33                        | 12.46                        | 0.27                      |
| <b>12</b> | 13.01                        | 13.11                        | 0.27                      |
| <b>13</b> | 9.38                         | 9.45                         | 0.15                      |
| <b>14</b> | 7.75                         | 7.86                         | 0.19                      |
| <b>15</b> | 7.38                         | 7.48                         | 0.28                      |
| <b>16</b> | 14.10                        | 14.21                        | 0.32                      |
| <b>17</b> | 7.68                         | 7.77                         | 0.46                      |

Table S1: Energy contributions (B3LYP/6-31G\*) to the correction of vertical excitation energies according to main article Eq. 7. We also report the relaxation energy on the T<sub>1</sub> B3LYP/6-31G\* potential energy surface ( $\Delta E_{\text{relax}}$ ). The latter was obtained by T<sub>1</sub> geometry optimization at the unrestricted Kohn-Sham level with the S<sub>0</sub> minimum as initial geometry. For several cases the SCF cycle for the UKS calculations at the S<sub>0</sub> minimum geometry converged to an excited triplet state. Initialization with the density matrix at the T<sub>1</sub> minimum geometry solved this issue. Relaxation of structure **13** lead to a severe overtwisting of the geometry.<sup>1</sup>  $\Delta E_{\text{relax}}$  has been obtained from a LC-PBE (tuned) optimization in this case. All energies in eV.

| #         | PBE  | B3LYP | LC-PBE |      |                                 |
|-----------|------|-------|--------|------|---------------------------------|
|           |      |       | tuned  | TDA  | $\gamma = 0.3 \text{ a}_0^{-1}$ |
| <b>1</b>  | 1.58 | 1.95  | 2.08   | 2.22 | 2.13                            |
| <b>2</b>  | 1.56 | 2.02  | 2.05   | 2.07 | 2.54                            |
| <b>3</b>  | 2.00 | 2.17  | 2.28   | 2.41 | 2.23                            |
| <b>4</b>  | 1.97 | 2.20  | 2.30   | 2.52 | 2.29                            |
| <b>5</b>  | 2.22 | 2.29  | 2.16   | 2.60 | 2.32                            |
| <b>6</b>  | 2.01 | 2.38  | 2.36   | 2.41 | 2.58                            |
| <b>7</b>  | 2.17 | 2.44  | 2.58   | 2.65 | 2.67                            |
| <b>8</b>  | 2.15 | 2.52  | 2.55   | 2.62 | 2.70                            |
| <b>9</b>  | 2.14 | 2.56  | 2.75   | 2.92 | 2.75                            |
| <b>10</b> | 2.15 | 2.58  | 2.77   | 2.99 | 2.76                            |
| <b>11</b> | 2.16 | 2.53  | 2.42   | 3.06 | 2.59                            |
| <b>12</b> | 2.15 | 2.63  | 2.57   | 2.60 | 2.83                            |
| <b>13</b> | 2.06 | 2.53  | 2.62   | 2.97 | 2.57                            |
| <b>14</b> | 2.31 | 2.68  | 2.83   | 3.01 | 2.81                            |
| <b>15</b> | 2.39 | 2.68  | 2.53   | 3.11 | 2.78                            |
| <b>16</b> | 2.59 | 2.81  | 2.92   | 3.05 | 2.88                            |
| <b>17</b> | 2.74 | 3.03  | 3.20   | 3.45 | 3.18                            |

Table S2: Vertical  $T_1$  absorption energies [eV].

| #         | PBE          | B3LYP        | LC-PBE       |              |                                 |
|-----------|--------------|--------------|--------------|--------------|---------------------------------|
|           |              |              | tuned        | TDA          | $\gamma = 0.3 \text{ a}_0^{-1}$ |
| <b>1</b>  | 1.83 (0.076) | 2.48 (0.126) | 2.76 (0.155) | 2.83 (0.187) | 3.18 (0.224)                    |
| <b>2</b>  | 1.75 (0.031) | 2.28 (0.033) | 2.31 (0.016) | 2.35 (0.020) | 2.99 (0.011)                    |
| <b>4</b>  | 2.17 (0.002) | 2.73 (0.017) | 3.22 (0.052) | 3.29 (0.054) | 3.25 (0.056)                    |
| <b>5</b>  | 2.70 (0.020) | 3.09 (0.054) | 3.63 (0.124) | 3.77 (0.148) | 3.44 (0.095)                    |
| <b>7</b>  | 2.33 (0.000) | 2.75 (0.001) | 2.94 (0.001) | 2.97 (0.001) | 3.25 (0.004)                    |
| <b>14</b> | 2.45 (0.000) | 3.08 (0.004) | 3.47 (0.011) | 3.51 (0.016) | 3.66 (0.021)                    |

Table S3: Vertical  $S_1$  absorption energies [eV], oscillator strengths in parentheses.

### 1.1 Influence of basis set size

| #         | 6-311G* & LANL2DZ | 6-311++G** & LANL2TZF |
|-----------|-------------------|-----------------------|
| <b>5</b>  | 2.29              | 2.25                  |
| <b>7</b>  | 2.44              | 2.37                  |
| <b>15</b> | 2.68              | 2.63                  |

Table S4: Vertical  $T_1$  absorption energies [eV] at the B3LYP level using basis sets of different size.

### 1.2 Influence of solvent model

| #         | COSMO | SMD   |
|-----------|-------|-------|
| <b>5</b>  | 2.287 | 2.290 |
| <b>7</b>  | 2.438 | 2.444 |
| <b>15</b> | 2.677 | 2.683 |

Table S5: Vertical  $T_1$  absorption energies [eV] at the B3LYP/6-311G\* & LANL2DZ level using the COSMO and SMD model for solvation (see main text).

## 2. FRONTIER MOLECULAR ORBITALS

In the following figures, initial (top) and final (bottom) molecular orbitals corresponding to the dominant single-particle transition for the  $T_1$  state are plotted for the PBE (left) and B3LYP (right) functionals. These are mostly HOMO to LUMO transitions with the exception of **9**, **13**, **16** at the B3LYP level, which are HOMO-1 to LUMO.

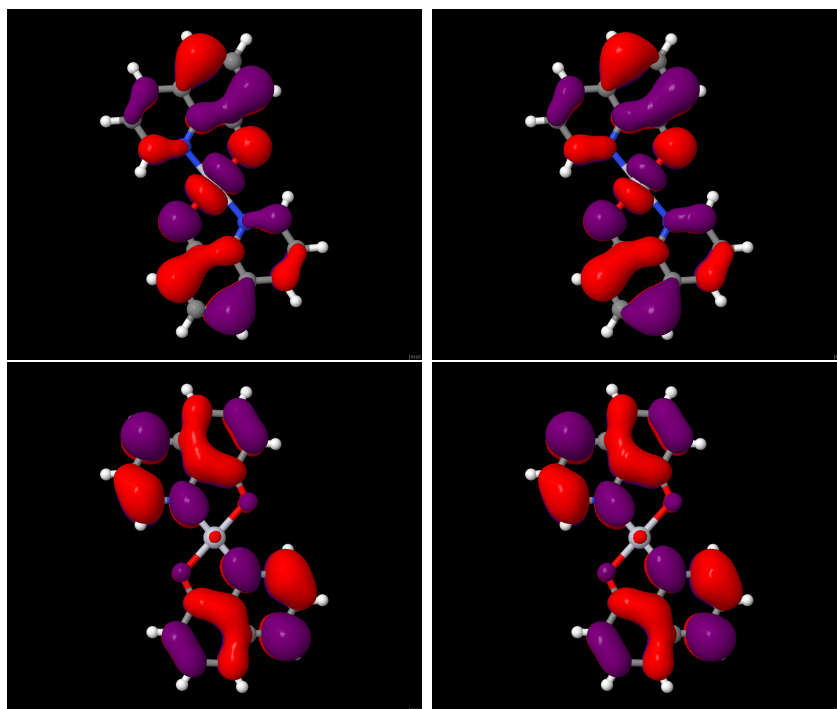

Figure S1: **Structure 1**

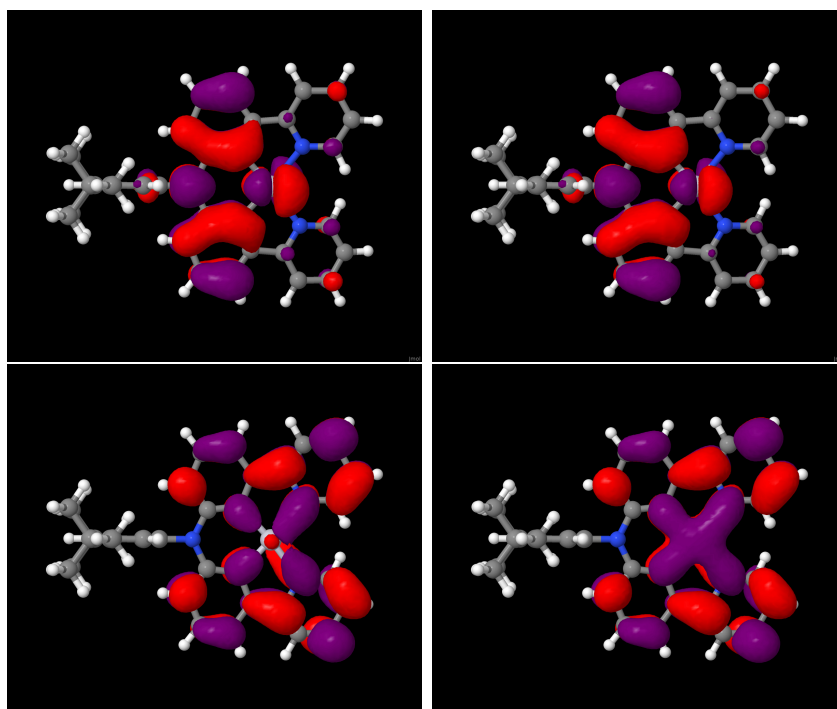

Figure S2: **Structure 2**

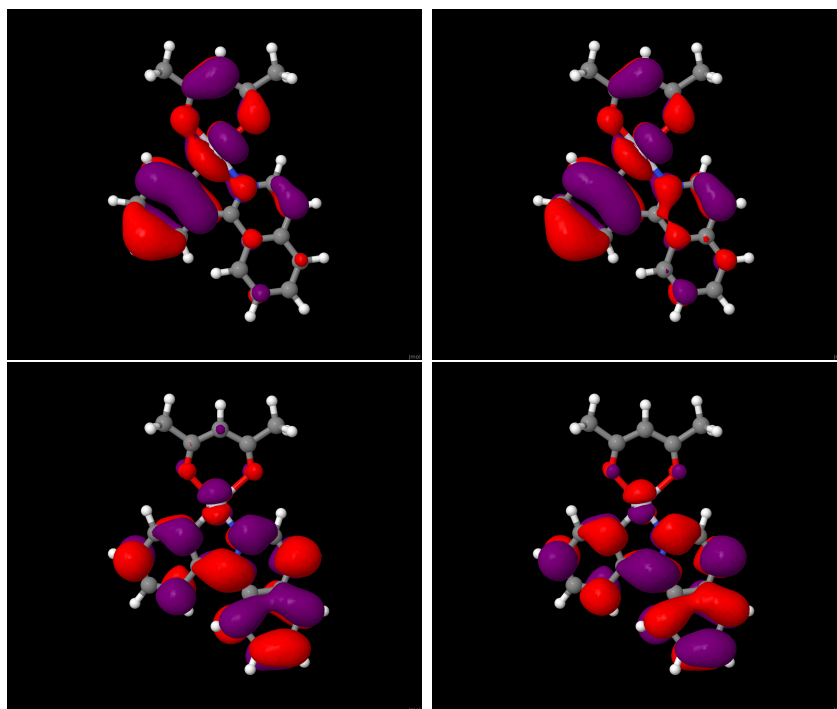

Figure S3: **Structure 3**

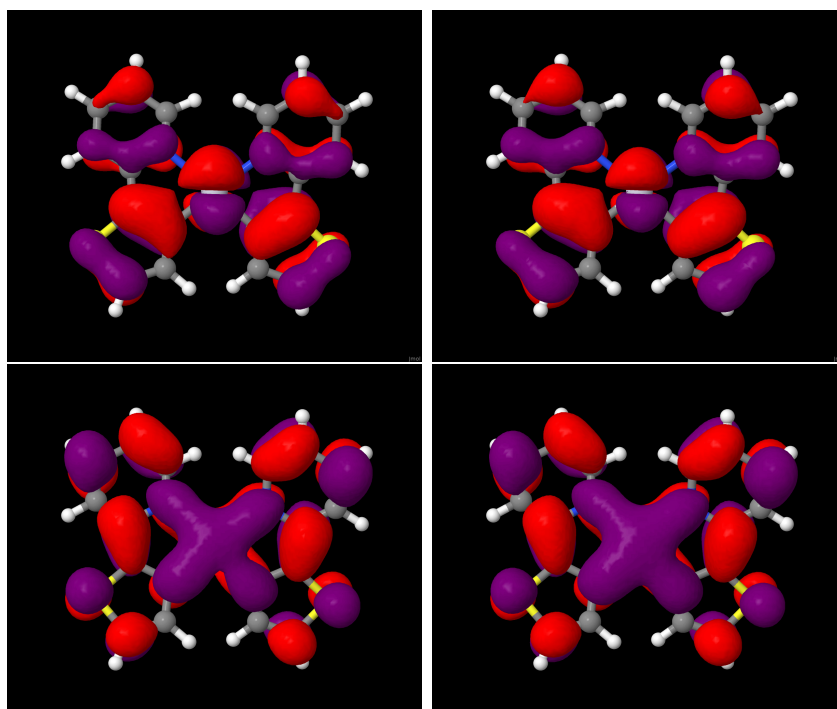

Figure S4: **Structure 4**

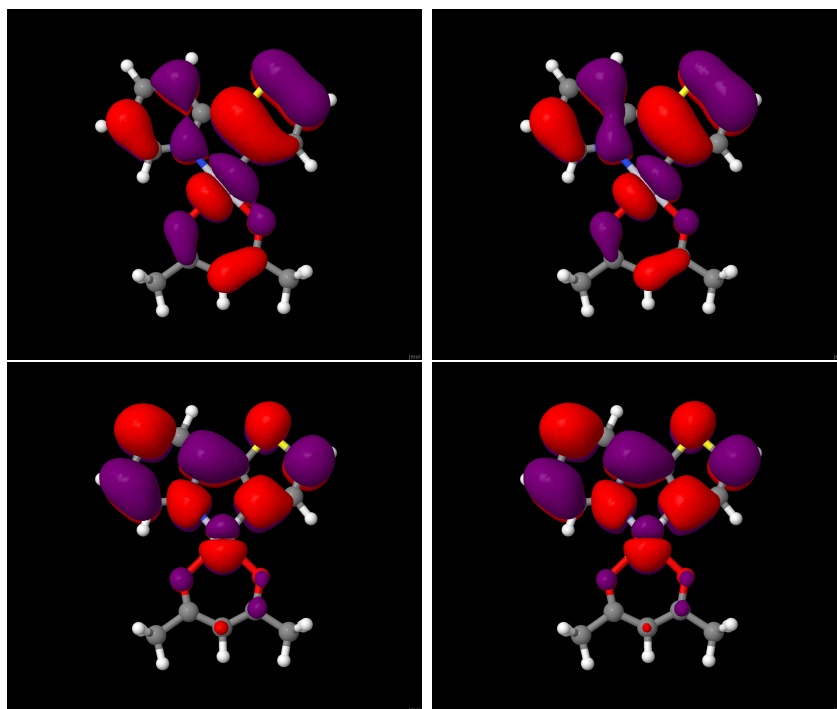

Figure S5: **Structure 5**

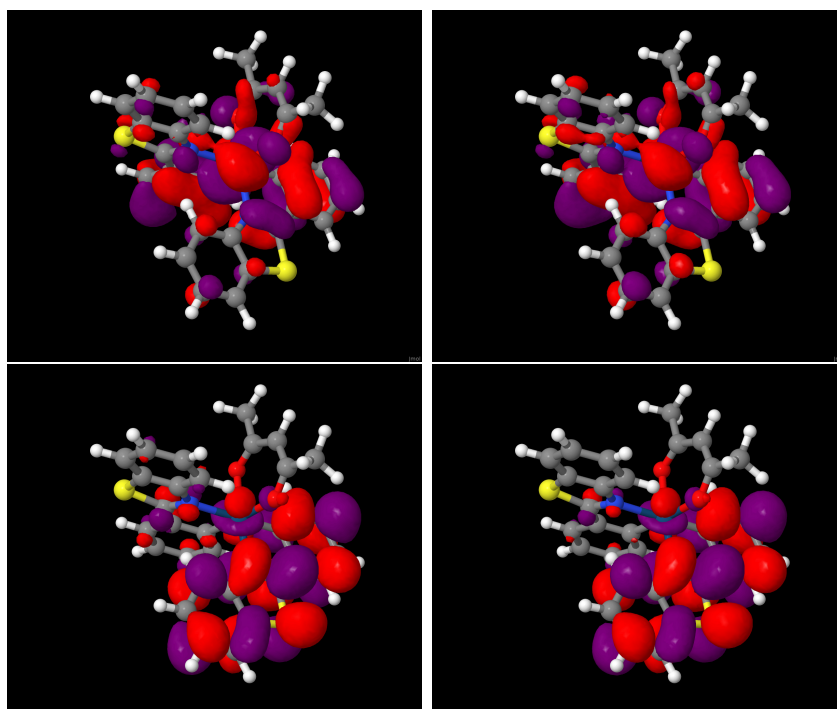

Figure S6: **Structure 6**

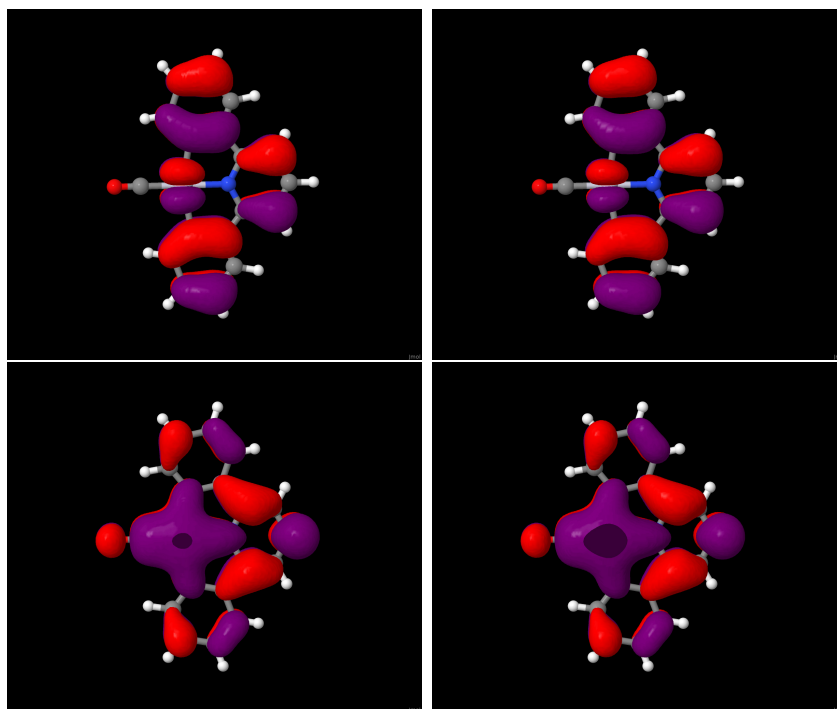

Figure S7: **Structure 7**

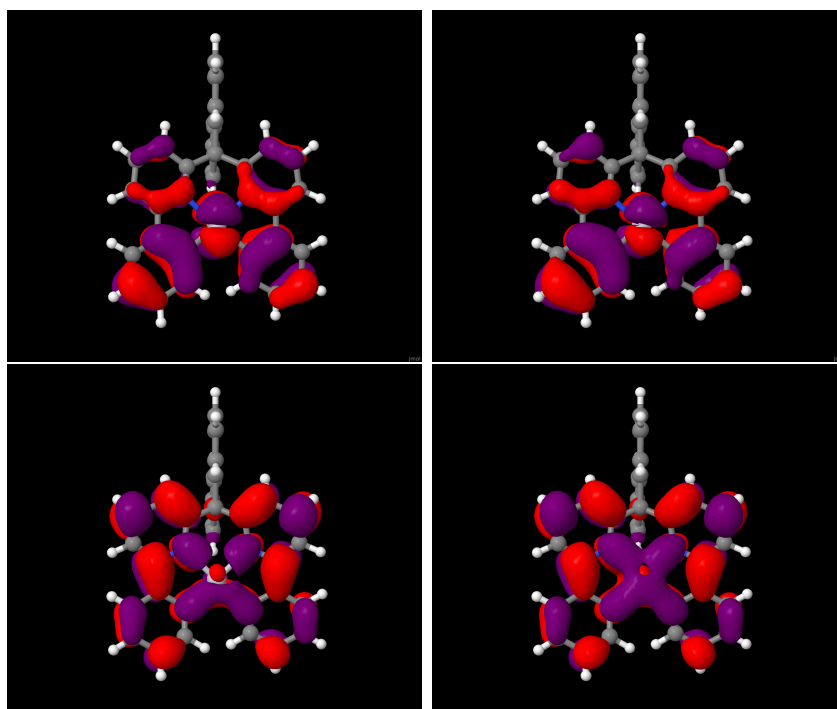

Figure S8: **Structure 8**



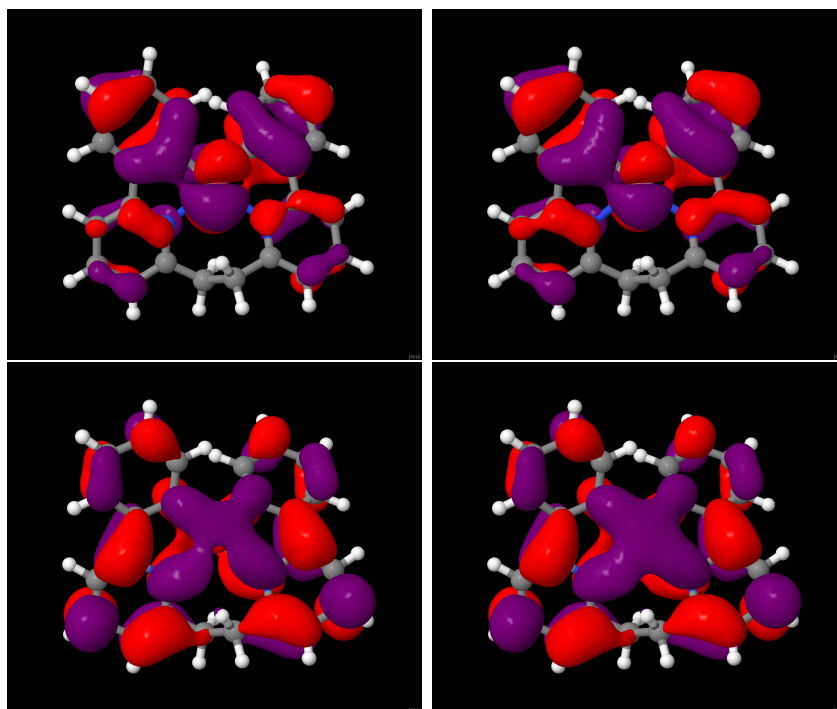

Figure S9: **Structure 9**

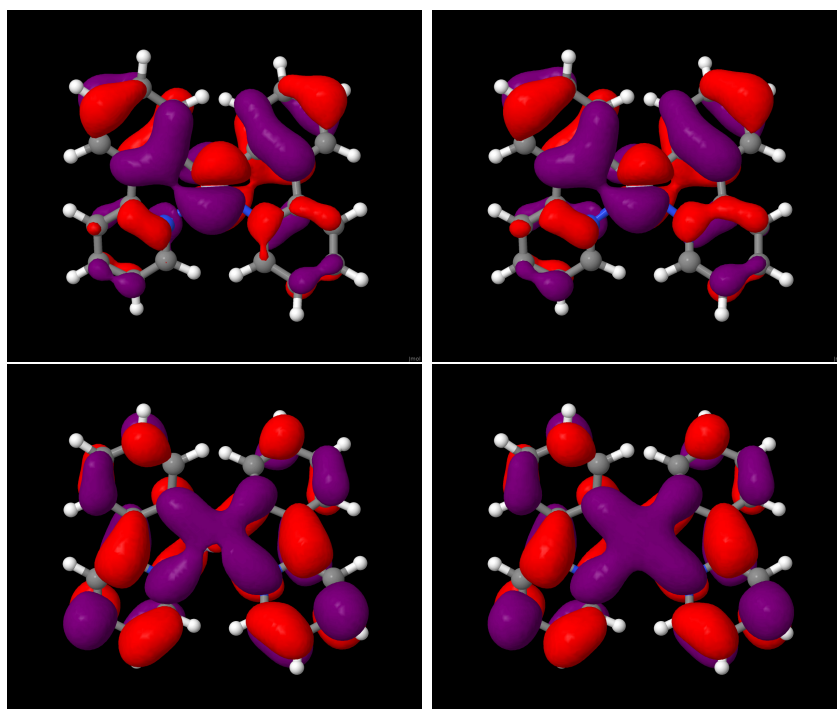

Figure S10: **Structure 10**

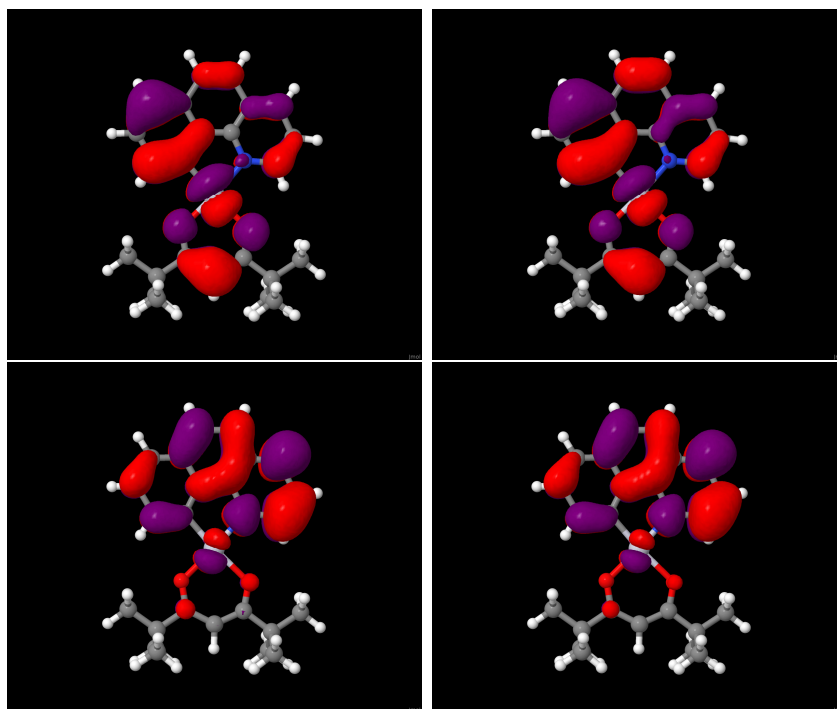

Figure S11: **Structure 11**

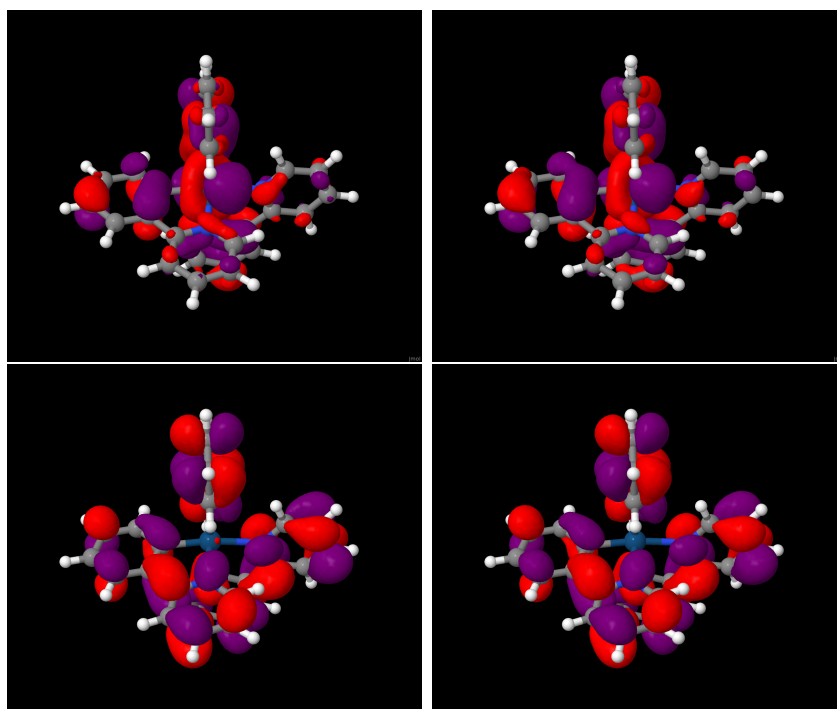

Figure S12: **Structure 12**

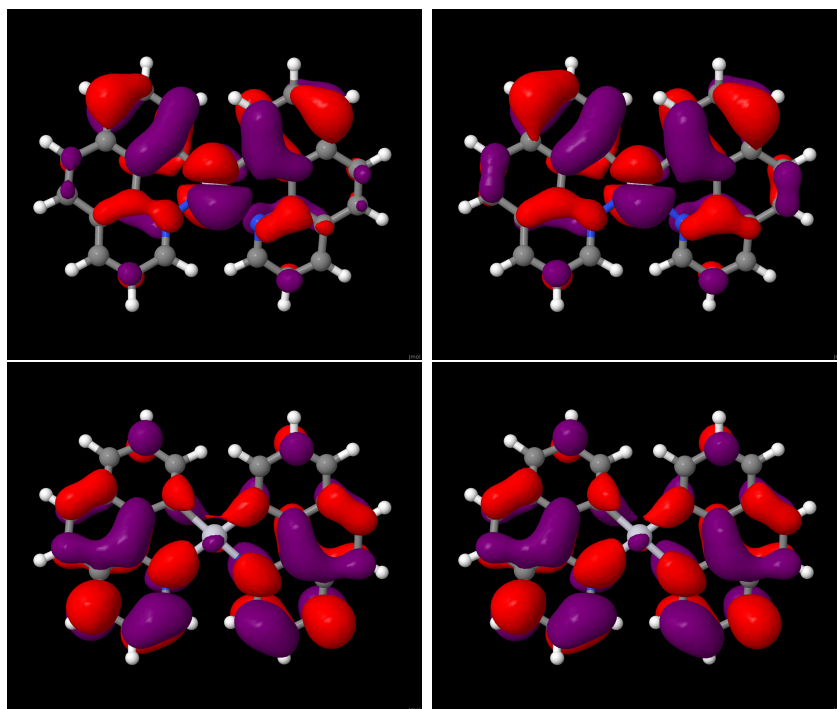

Figure S13: **Structure 13**

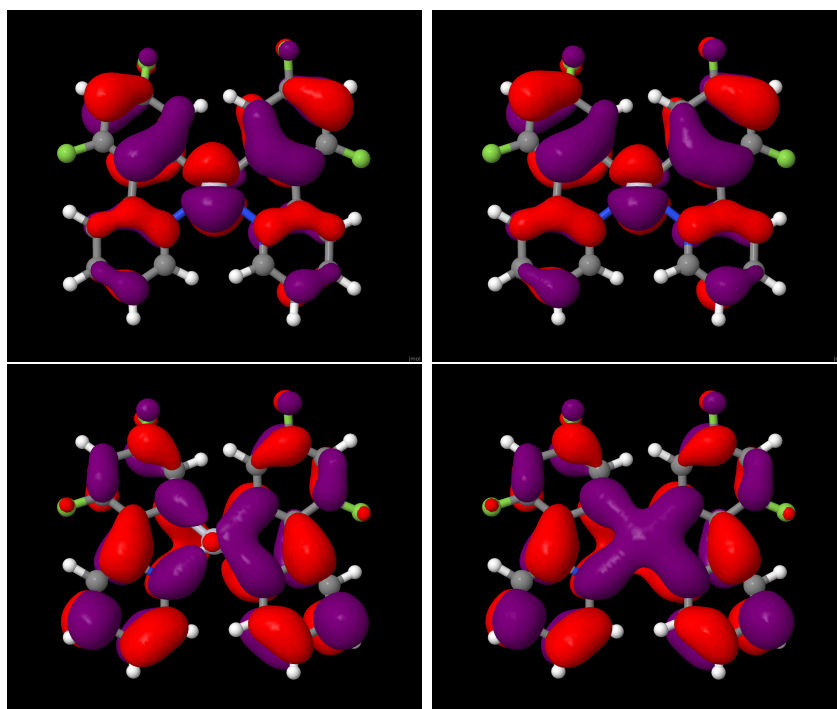

Figure S14: **Structure 14**

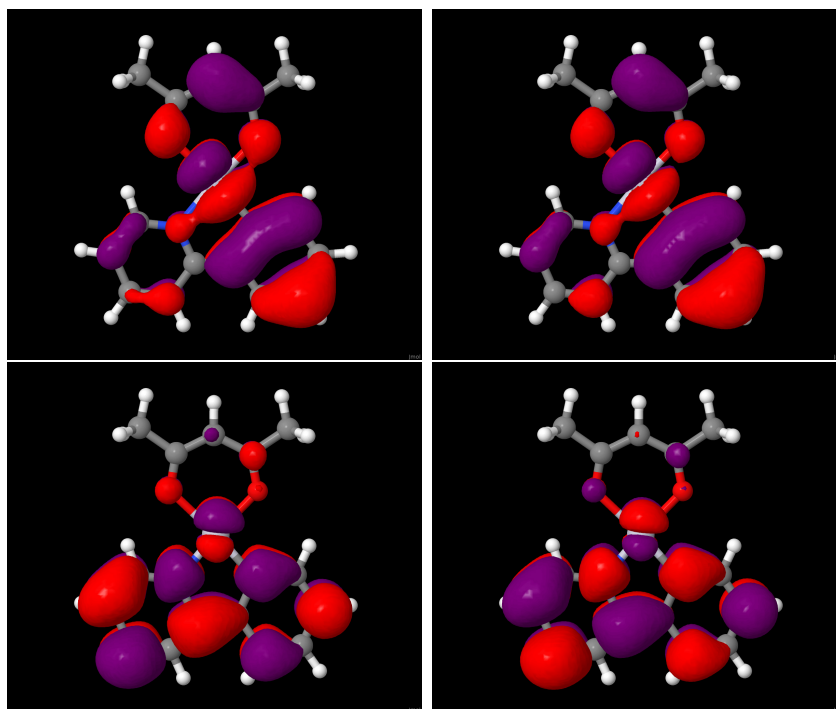

Figure S15: **Structure 15**

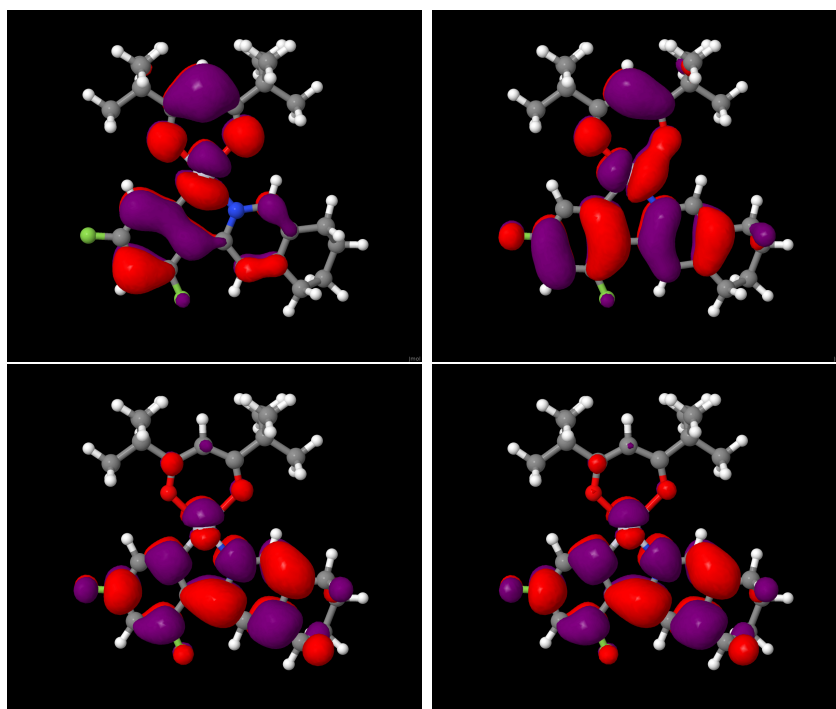

Figure S16: **Structure 16**

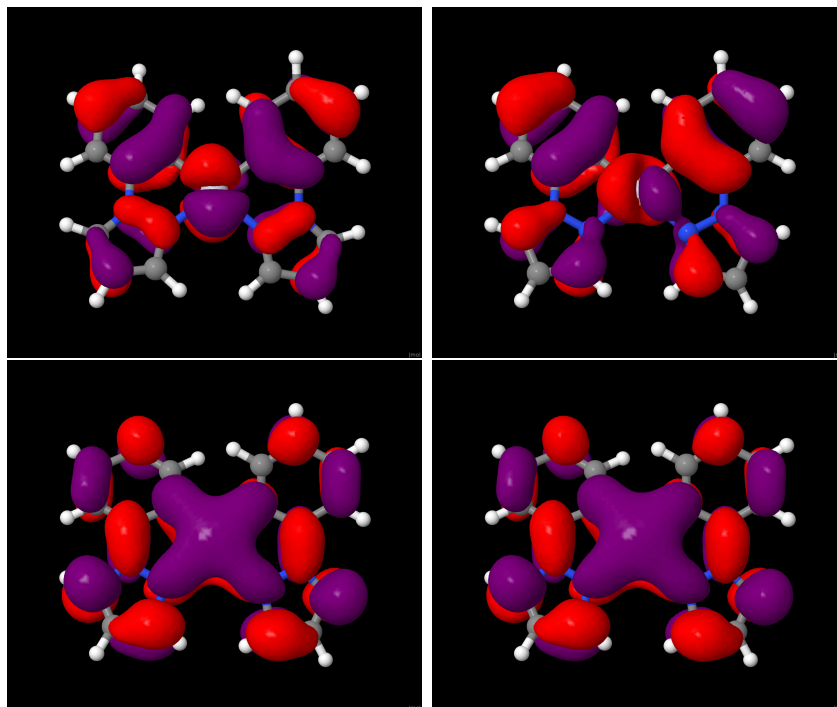

Figure S17: **Structure 17**

## REFERENCES

1. P. Wiggins, J. G. Williams, and D. J. Tozer, "Excited state surfaces in density functional theory: a new twist on an old problem," *J. Chem. Phys.*, vol. 131, no. 9, p. 091101, 2009.
